# Supplementary material
Source: MDPI journal article supplement (https://www.mdpi.com/1424-2818/15/6/740)
Supplement: s1 [file Supplementary File S1.pdf › Supplementary File S1.pdf]

|                |
|----------------|
| Interview Code |
|----------------|

**Data's Sheet**

|                                                                                                    |
|----------------------------------------------------------------------------------------------------|
| Interview Code:<br>Location:<br>Progressive number of the interviewees:<br>Date: <i>DD-MM-YYYY</i> |
|----------------------------------------------------------------------------------------------------|

**General introductive information**

1 More or less how old you were when you stated to work as fishermen/Since which year you are a fisherman?

|  |
|--|
|  |
|--|

2.1 Do you belong to a family of fishermen?

Yes ☐ No ☐

2.2 Which other members of the family are fishermen?

|  |
|--|
|  |
|--|

**General information on the vessel**

3 Type of boat and dimensions:

|  |
|--|
|  |
|--|

4.1 How many people are part of the crew (including you)?

|  |
|--|
|  |
|--|

4.2 How many are fishermen?

|  |
|--|
|  |
|--|

Interview Code

**Fishing activity and nets damage**

5 In which period do you fish?

All year's long ☐

In specific periods ☐

Spring (P) ☐, Summer (E) ☐, Autumn (A) ☐, Winter (I) ☐

6 In which area do you fish?

7 Which are the main prey of your fishing activity? (*target species*)

8.1 Which fishing gears do you use?

Gill Net ☐, Trammel Net ☐, Bottom Long Line ☐,  
Others

8.2 At what depth do you set the gears?

8.3 At what distance from the cost do you set the gears?

9.1 Can you characterize the damage the gears are subjected to? Or can you give an order of magnitude!?

Large vertical lacerations with twisted net parts (V) ☐

Wide laceration from the bottom loosening leads (F) ☐

Single holes and stretches of nets (S) ☐

Single holes or in group of 3, 20-30 cm wide (T) ☐

No damage (D) ☐

Did not answer (N) ☐

Other

9.2 How frequently?

Every time gears are set (O) ☐, Sometimes (Q) ☐, Rarely (R) ☐,

Never (M) ☐, Did not answer (N) ☐

**Other damages**

10 Apart from the damage to the gears, other damages are often reported, can you give an order of importance to the following damages sustained by catches?

Fishes scared away from the nets ☐ *-Presence of predators-*

Holes (*net*) that allow fishes to escape ☐

Fishes (*caught in the net*) damaged ☐ *-by predators-*

Other

No damages ☐

Did not answer ☐

11 Which are the most commonly predated species?

12 In your opinion , which one is the main cause of the damages?

13.1 Do you use any methods to avoid the damages?

Yes ☐, No ☐, Did not answer ☐

13.2 Which one?

14.1 Which solutions do you propose to minimize the damages?

Predator elimination ☐

Predator estrangement ☐ (*acoustic device*)

Compensatory formulas ☐

14.2 Which of the following compensatory formulas do you find the most satisfactory? *If compensative formulas were chosen in the in the previous*

Monetary compensation ☐

Provision of structures or means ☐ (*port, vessel, net...*)

Taxes relieves or reductions ☐

**Encounters during fishing activities**

15 In the last 13 years (from 2000 onward) during your fishing journeys did you have the chance to encounter the following animals?

Dolphins                      Yes ☐, No ☐, Did not answer ☐

Seals                              Yes ☐, No ☐, Did not answer ☐

Turtles                          Yes ☐, No ☐, Did not answer ☐

And in the past (before 2000)?

Dolphins

Seals

Turtles

16 In which period do you record such encounters? *To be repeated for each species for 2000 onward and for the past (before 2000)*

17 In which areas do you record the encounters? *To be repeated for each species for 2000 onward and for the past (before 2000)*

18 How frequently? *Eventually To be repeated for each species for 2000 onward and for the past (before 2000)*

Every fishing day (O)                      ☐

Sometimes (Q)                              ☐

Rarely (R)                                    ☐

Never (M)                                    ☐

Did not answer (N)                      ☐

19.1 Do their presence affects your activity?

Yes ☐, No ☐, Did not answer ☐

19.2 In which way?

**General questions on catch**

20.1 Do you think that catch has decrease over the years in the area?

Yes ☐, No ☐, Do not know ☐, Did not answer ☐

20.2 In your opinion which one is the main cause for such decrement? *In case of more than one gives an order number*

Pollution ☐

Climate change ☐

Overfishing ☐

Illegal fishery ☐

Predators ☐

Other

Do not know ☐

Did not Answer ☐

21 Which proposals between the following you think is more effective for the maintenance of the fish stocks in the area?

Protected Area establishment ☐

No-fishing period or Season ☐

Ban of some fishing methods. Which one?

Use of alternative fishing methods ☐

Other

Do not know ☐

Did not answer ☐

**Questions on environmental protection**

22 In your opinion fishermen category should be involved in decision-making and management of environment and territory protection?

Yes ☐, No ☐, Do not know ☐, Did not answer ☐

23 Are you willing to collaborate in studies/researches, for monitoring and control activities in the areas under protection? *or*

Are you willing to collaborate in scientific studies having an observer in your vessel?

Yes ☐, No ☐, Do not know ☐, Did not answer ☐

24 Which condition/limitation are you available to accept for territory protection? *or*

Are you willing to negotiate/discuss/consider proposals for territory protection? *trade off*

Limitations of the fishing periods Yes ☐, No ☐, Did not answer ☐

Limitation of the fishing areas Yes ☐, No ☐, Did not answer ☐

Limitation in the prey species Yes ☐, No ☐, Did not answer ☐

Interview Code

**General information for the interview closure**

*Name of the vessel or of the fishermen (the questionnaire will be anyway anonymous)*

25 Age:

26 School level:

27 Are you enrolled in a fishing cooperative? If so, which one?

28.1 Is fishery your main activity? Yes ☐, No ☐

28.2 Are the other activities are connected to the fishery sector as well? Yes ☐, No ☐

28.3 What are those?
