# Supplementary material
Source: MDPI journal article supplement (https://www.mdpi.com/1424-2818/15/6/740)
Supplement: s1 [file Supplementary File S2.pdf › Supplementary File S2.pdf]

### Number of registered fishing vessels by fishing districts:

65 boats registered to the Port Authority of Torre Cesarea (Porto Cesareo);

109 boats registered to the Port Authority of Gallipoli;

10 boats registered to the Port Authority of Torre San Giovanni d'Ugento;

16 boats registered to the Port Authority of Santa Maria di Leuca;

6 boats registered to the Port Authority of Tricase;

21 boats registered to the Port Authority of Castro Marina;

31 boats registered to the Port Authority of Otranto;

13 boats registered to the Port Authority of San Cataldo.

**Figure S1.** Distribution of artisanal fishery vessels as indicated by Port Authority registers and Ports where the interviews were carried out.

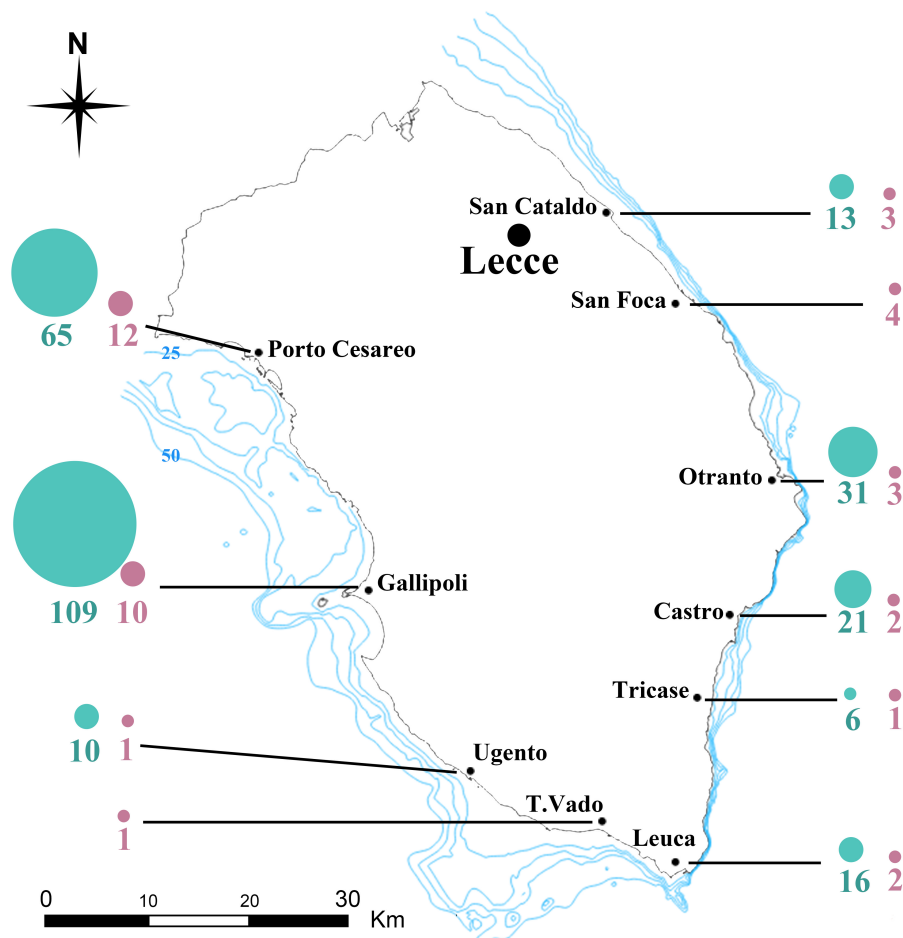

*The numbers and circles on the left (in green) represent the number of Artisanal fishery vessels as indicated by the Port Authority registers and shown by fishing districts; the numbers and circles on the right (pink) represent the number of Artisanal fishery vessels belonging to fishermen interviewed and shown by the ports where the interviews were carried out*
